# Supplementary material for: Association between Neighborhood Food Access, Household Income, and Purchase of Snacks and Beverages in the United States
Source: MDPI journal article supplement (doi:10.3390/ijerph17207517), 2020-10-15
Supplement: s1 [file s1]

## Appendix A: measures

### Purchase of snacks and beverages

**Table S1.** Produce type and Nielsen production group module description.

| Food type | Department <sup>a</sup> | Product module/brand <sup>a</sup>          |
|-----------|-------------------------|--------------------------------------------|
| Snacks    | Dry grocery             | snacks - potato chips                      |
|           |                         | snacks - tortilla chips                    |
|           |                         | snacks - puffed cheese                     |
|           |                         | snacks – remaining                         |
|           |                         | snacks - corn chips                        |
|           |                         | snacks – meat                              |
|           |                         | snacks - pork rinds                        |
|           |                         | snacks - potato sticks                     |
|           |                         | snacks - health bars & sticks              |
|           |                         | popcorn – popped                           |
|           |                         | popcorn – unpopped                         |
|           |                         | snacks - caramel corn                      |
|           |                         | snacks - pretzel                           |
| Beverages | Dry grocery             | soft drinks - low calorie                  |
|           |                         | fruit drinks-other container               |
|           |                         | soft drinks – carbonated                   |
|           |                         | soft drinks – powdered                     |
|           |                         | fruit drinks & juices-cranberry            |
|           |                         | fruit drinks-canned                        |
|           |                         | remaining drinks & shakes-non refrigerated |
|           |                         | fruit juice - orange - other container     |
|           |                         | fruit juice-remaining                      |
|           |                         | fruit juice – apple                        |
|           |                         | fruit juice – grape                        |
|           |                         | fruit juice - lemon/lime                   |
|           |                         | fruit juice-nectars                        |
|           |                         | fruit juice - grapefruit - other cont..    |
|           | Frozen foods            | fruit juice-prune                          |
|           |                         | fruit juice – pineapple                    |
|           |                         | fruit juice-grapefruit-canned              |
|           |                         | fruit juice-orange-canned                  |
|           |                         | vegetable juice – tomato                   |
|           |                         | fruit drinks & mixes - frozen              |
|           |                         | fruit drinks & orange – frozen             |
|           |                         | fruit juice - remaining - frozen           |
|           |                         | fruit juice - orange - frozen              |
|           |                         | fruit juice - grapefruit - frozen          |
|           |                         | fruit juice - apple - frozen               |
|           |                         | fruit juice - grape - frozen               |
|           |                         | fruit juice - unconcentrated - frozen      |

Note: <sup>a</sup>Department, product module, and brand are all Nielsen defined product codes. Food purchase data and household-level sociodemographic data were derived from the Nielsen Homescan Consumer Dataset in 2010. Copyright©2018, The Nielsen Company.

In calculating the annual expenditure on snacks or beverages by household, we linked the product file to the purchase file using the UPC numbers (variable name 1=upc, variable name 2=upc\_ver\_uc) as the joint identifying numbers to create a purchase-product file. Upc\_ver\_uc indicated different versions of upc. We then linked the purchase-product file to the trip file using the trip number (variable name=trip\_code\_uc) as the joint identifying number to create a trip-purchase-product file. We linked the trip-purchase-product file to the household sociodemographic file using the household number (variable name=household\_code) as the joint identifying number to create a household-trip-purchase-product file.

To properly classify self-reported expenditures, we used the departmental category (dry grocery, frozen goods) and the product module description (e.g., snacks, fresh juice, fresh drinks) to

identify snacks or beverages. We then calculated the self-reported expenditures on snacks and beverages (separately) under each standard-UPC products. We finally summed up the total expenditures for all standard-UPC products by household for 2010.

*Appendix B: Percent of households under the poverty line*

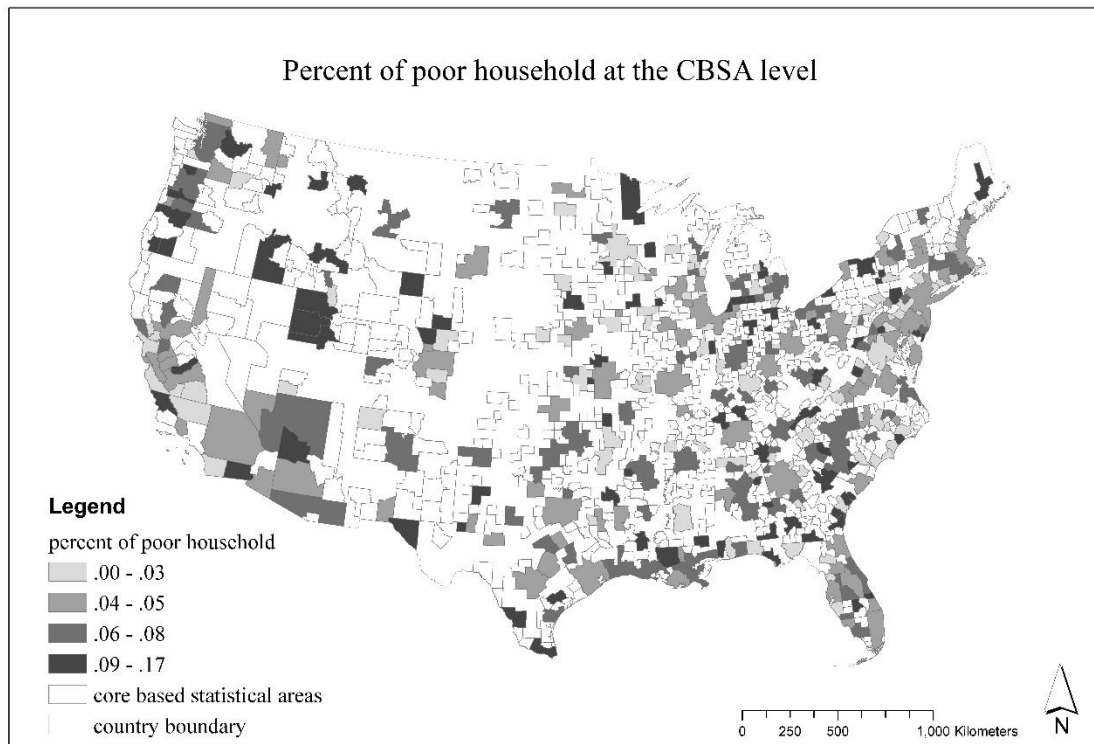

**Figure S1.** Percent of poor households at the CBSA level in the United States (2010).

## Appendix C: data analyses and results

**Table S2.** Regression results for snacks purchased by poor and non-poor households (large ZCTAs excluded, 3-km buffer).

|                                     | Poor Households ( <i>n</i> = 1460 <sup>a</sup> ) |       |          | Non-Poor Households ( <i>n</i> = 32,561 <sup>a</sup> ) |       |          |
|-------------------------------------|--------------------------------------------------|-------|----------|--------------------------------------------------------|-------|----------|
|                                     | B                                                | SE    | <i>P</i> | B                                                      | SE    | <i>P</i> |
| Number of convenience stores, count | -0.009                                           | 0.004 | 0.016    | -0.002                                                 | 0.001 | 0.062    |
| Number of supermarkets, count       |                                                  |       |          |                                                        |       |          |
| 0 (Ref.)                            | ---                                              | ---   | ---      | ---                                                    | ---   | ---      |
| 1                                   | 0.007                                            | 0.065 | 0.909    | -0.028                                                 | 0.013 | 0.034    |
| 2+                                  | 0.025                                            | 0.075 | 0.744    | -0.030                                                 | 0.017 | 0.070    |

<sup>a</sup> We excluded households who purchased extremely low or high values for purchases of snacks, defined here as less than the 5th percentile or greater than the 95th percentile. We also excluded who lived in large ZCTAs. *P* values in bold indicate statistically significant associations ( $p < 0.05$ ). Food purchase data and household-level soicodemographic data were derived from the Nielsen Homescan Consumer Dataset in 2010. Copyright © 2018, the Nielsen Company. *n*, number of observations; CI, confidence interval; Ref., reference category.

**Table S3.** Regression results for beverages purchased by poor and non-poor households (large ZCTAs excluded, 3-km buffer).

|                                     | Poor households below the poverty line ( <i>n</i> = 1480 <sup>a</sup> ) |       |          | Non-poor households( <i>n</i> = 32,806 <sup>a</sup> ) |       |          |
|-------------------------------------|-------------------------------------------------------------------------|-------|----------|-------------------------------------------------------|-------|----------|
|                                     | B                                                                       | SE    | <i>P</i> | B                                                     | SE    | <i>P</i> |
| Number of convenience stores, count | -0.007                                                                  | 0.004 | 0.085    | 0.0016                                                | 0.001 | 0.586    |
| Number of supermarkets, count       |                                                                         |       |          |                                                       |       |          |
| 0 (Ref.)                            | ---                                                                     | ---   | -        | ---                                                   | ---   | -        |
| 1                                   | -0.043                                                                  | 0.074 | 0.557    | 0.013                                                 | 0.014 | 0.348    |
| 2+                                  | -0.011                                                                  | 0.087 | 0.896    | 0.005                                                 | 0.018 | 0.792    |

<sup>a</sup> We excluded households who purchased extremely low or high values for purchases of beverages, defined here as less than the 5th percentile or greater than the 95th percentile. We also excluded who lived in large ZCTAs. Food purchase data and household-level soicodemographic data were derived from the Nielsen Homescan Consumer Dataset in 2010. Copyright © 2018, the Nielsen Company. *N*, number of observations; CI, confidence interval; Ref., reference category.

**Table S4.** Regression results for snacks purchased by poor and non-poor households (5-km buffer).

|                                     | <b>Poor Households (<i>n</i> = 1913 <sup>a</sup>)</b> |           |                 | <b>Non-Poor Households (<i>n</i> = 40,854 <sup>a</sup>)</b> |           |                 |
|-------------------------------------|-------------------------------------------------------|-----------|-----------------|-------------------------------------------------------------|-----------|-----------------|
|                                     | <b>B</b>                                              | <b>SE</b> | <b><i>P</i></b> | <b>B</b>                                                    | <b>SE</b> | <b><i>P</i></b> |
| Number of convenience stores, count | -0.004                                                | 0.002     | 0.011           | 0.001                                                       | 0.001     | 0.140           |
| Number of supermarkets, count       |                                                       |           |                 |                                                             |           |                 |
| 0 (Ref.)                            | -                                                     | ---       | ---             | ---                                                         | ---       | ---             |
| 1                                   | 0.021                                                 | 0.059     | 0.719           | -0.027                                                      | 0.005     | 0.030           |
| 2+                                  | -0.000                                                | 0.073     | 0.997           | -0.023                                                      | 0.006     | 0.159           |

<sup>a</sup> We excluded households who purchased extremely low or high values for purchases of snacks, defined here as less than the 5th percentile or greater than the 95th percentile. *P* values in bold indicate statistically significant associations (*p* < 0.05). Food purchase data and household-level soicodemographic data were derived from the Nielsen Homescan Consumer Dataset in 2010. Copyright©C2018, the Nielsen Company. *n*, number of observations; CI, confidence interval; Ref., reference category.

**Table S5.** Regression results for beverages purchased by poor and non-poor households (5-km buffer).

|                                     | <b>Poor households (<i>n</i> = 1944 <sup>a</sup>)</b> |           |                 | <b>Non-poor households (<i>n</i> = 41,063 <sup>a</sup>)</b> |           |                 |
|-------------------------------------|-------------------------------------------------------|-----------|-----------------|-------------------------------------------------------------|-----------|-----------------|
|                                     | <b>B</b>                                              | <b>SE</b> | <b><i>P</i></b> | <b>B</b>                                                    | <b>SE</b> | <b><i>P</i></b> |
| Number of convenience stores, count | 0.003                                                 | 0.002     | 0.210           | 0.000-                                                      | 0.001     | 0.681           |
| Number of supermarkets, count       |                                                       |           |                 |                                                             |           |                 |
| 0 (Ref.)                            | ---                                                   | ---       | ---             | ---                                                         | ---       | ---             |
| 1                                   | 0.047                                                 | 0.062     | 0.450           | 0.001                                                       | 0.013     | 0.944           |
| 2+                                  | -0.004                                                | 0.072     | 0.958           | -0.005                                                      | 0.015     | 0.747           |

<sup>a</sup> We excluded households who purchased extremely low or high values for purchases of beverages, defined here as less than the 5th percentile or greater than the 95th percentile. Food purchase data and household-level soicodemographic data were derived from the Nielsen Homescan Consumer Dataset in 2010. Copyright©C2018, the Nielsen Company. *n*, number of observations; CI, confidence interval; Ref., reference category.
